# Supplementary material
Source: publisher figshare collection journal article supplement (https://karger.figshare.com/ndownloader/files/30940633)
Supplement: Supplementary file 1 [file 30940633]

# SUPPLEMENTAL MATERIAL

Tharani Thirugnanachandran1, MBChB, FRACP, Henry Ma1,FRACP, PhD, Melissa Mitchell1, MBBS, Chloe Wong1, MBBS, Jason Vuong1, MBBS, Shaloo Singhal1, MBBS, FRACP, Lee- Anne Slater2, FRANZCR, Richard Beare3, PhD, Velandai Srikanth4, FRACP, PhD, Thanh Phan1, FRACP, PhD

1Stroke & Ageing Research (STAR), Department of Medicine, School of Clinical Sciences at Monash Health, Monash University, Clayton, VIC, 2Monash Health, Diagnostic Imaging, Monash Health, Clayton, Australia, 3Murdoch Children’s Research Institute, Developmental Imaging Group - Neurosciences Research Unit - Southern Clinical School - Monash University, Melbourne, Australia, 4Peninsula Clinical School, Central Clinical School, Monash University, Melbourne, Australia.

Supplementary: I) PRISMA flow diagram; II) Histogram of hierarchical partitioning of corticofugal fiber tracts at stroke onset (A) and seven days (B) post stroke (M1 - Blue, PMdv – Green, SMA – Red); III) The M1 fiber tracts (blue) from the SMATT template are mapped to infarct topography of ACA stroke. The 3D figure demonstrates the posterior location of the M1 fiber tracts.

Prof Thanh G Phan

Department of Neurology, Monash Health, 246 Clayton Road, Clayton

Clinical Trials, Imaging and Infomatics (CTI) Division,

Stroke and Aging Research Group, Department of Medicine, Monash University

Victoria, Australia, 3168, Phone: +613 9594 2240, Fax: +613 9594 6241 Email:Thanh.Phan@monash.edu

72 patients with ACA stroke assessed for eligibility

38 patients had MRI scans

47 patients with confirmed ACA stroke

25 excluded:

16 – concomitant infarcts in other arterial territories

9 – no visible vessel occlusion on CTA/MRA

32 patients had suitable CTP scans

# Supplementary Figure I – PRISMA flow diagram

**Supplementary Figure II – Hierarchical partitioning of corticofugal fibre tracts at stroke onset (A) and seven days (B) post stroke (M1 - Blue, PMdv – Green, SMA – Red).**


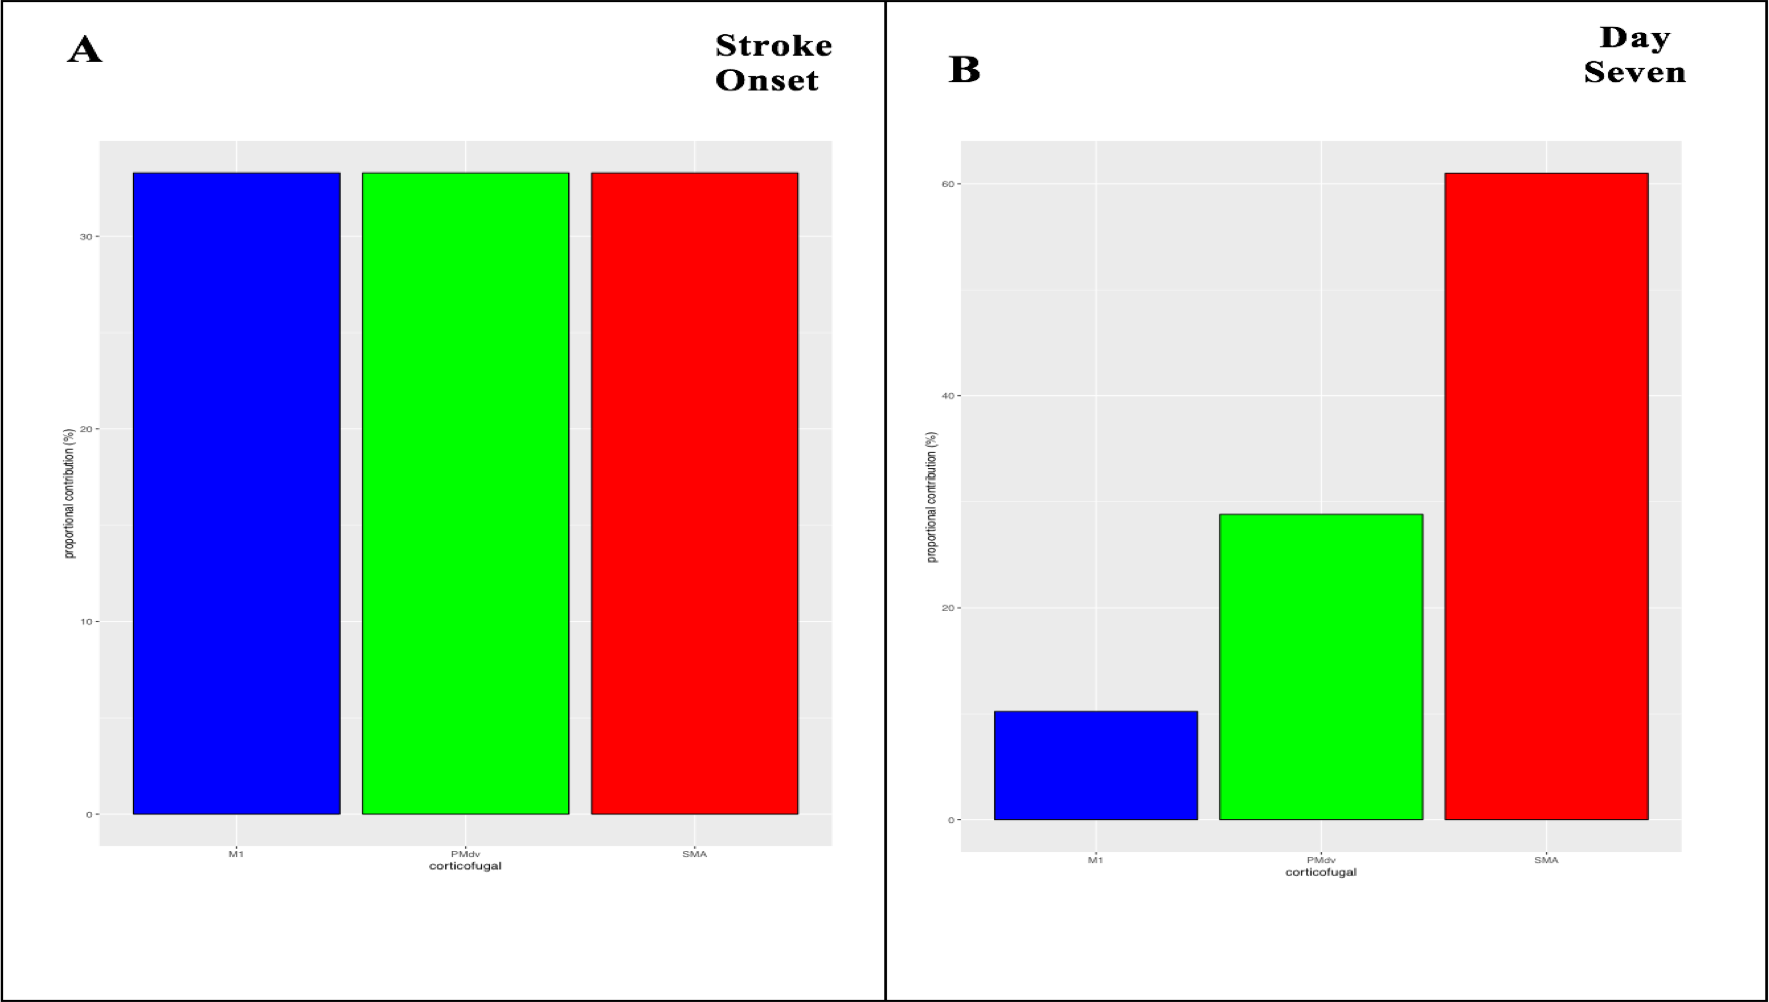


**M1**

**PMdv**

**SMA**

**M1**

**PMdv**

**SMA**


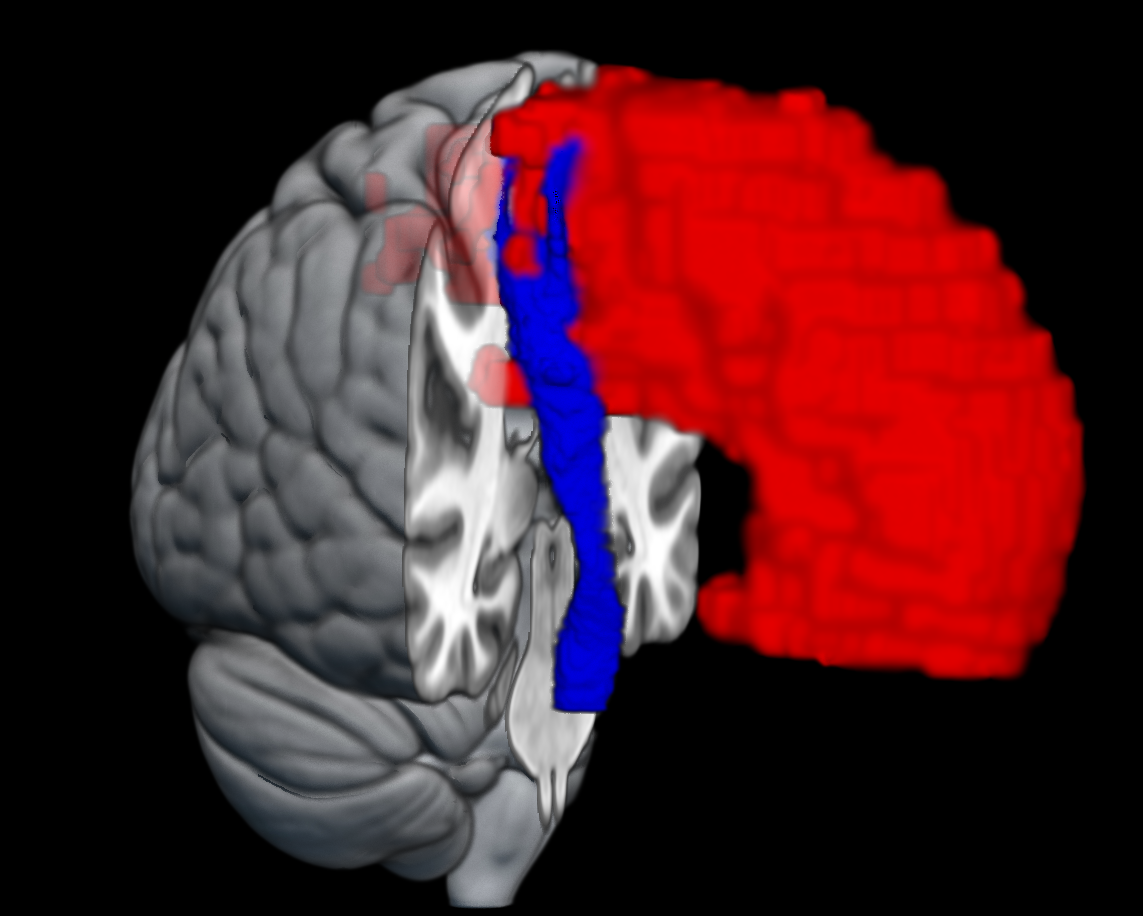


**Supplementary Figure III) The M1 fiber tracts (blue) from the SMATT template are mapped to infarct topography of ACA stroke. The 3D figure demonstrates the posterior location of the M1 fiber tracts.**
